# Supplementary material for: MRPS17 promotes invasion and metastasis through PI3K/AKT signal pathway and could be potential prognostic marker for gastric cancer
Source: PubMed Central journal article supplement (PMC8247386; doi:10.7150/jca.55719), 2021-06-11
Supplement: jcav12p4849s1.pdf [file jcav12p4849s1.pdf]

| siRNA                    | The siRNA oligonucleotides |
|--------------------------|----------------------------|
| genOFFTM st-h-MRPS17_002 | GGCTGAGATCGTTTTCAAA        |
| genOFFTM st-h-MRPS17_003 | GGAAGGTGATTGGGACAAA        |

**Supplementary Table 1.** The siRNA oligonucleotides against MRPS17.

| Characteristic        | Mrps17 Positive<br>N=35 | Mrps17 Negative<br>N=65 |
|-----------------------|-------------------------|-------------------------|
| Age                   |                         |                         |
| ≤65                   | 26                      | 50                      |
| > 65                  | 9                       | 15                      |
| Gender                |                         |                         |
| Female                | 11                      | 23                      |
| Male                  | 24                      | 42                      |
| TNM stage             |                         |                         |
| I-II                  | 15                      | 34                      |
| III-IV                | 20                      | 31                      |
| Tumor stage           |                         |                         |
| T1-T2                 | 4                       | 25                      |
| T3-T4                 | 31                      | 40                      |
| Lymph node metastasis |                         |                         |
| No                    | 30                      | 61                      |
| Yes                   | 5                       | 4                       |

**Supplementary Table 2.** Baseline of immunohistochemistry patients in our center.

| Characteristic     | N   | Characteristic    | N   |
|--------------------|-----|-------------------|-----|
| <b>Age</b>         |     | <b>Lymph node</b> |     |
| ≤65                | 197 | N0                | 132 |
| > 65               | 241 | N1                | 119 |
| unknow             | 5   | N2                | 85  |
| <b>Gender</b>      |     | N3                | 88  |
| Female             | 158 | NX                | 19  |
| Male               | 285 | <b>metastasis</b> |     |
| <b>grade</b>       |     | M0                | 391 |
| G1                 | 12  | M1                | 30  |
| G2                 | 159 | MX                | 22  |
| G3                 | 263 | <b>TNM stage</b>  |     |
| GX                 | 9   | I                 | 59  |
| <b>Tumor stage</b> |     | II                | 130 |
| T1                 | 23  | III               | 183 |
| T2                 | 93  | IV                | 44  |
| T3                 | 198 | unknow            | 27  |
| T4                 | 119 |                   |     |
| TX                 | 10  |                   |     |

**Supplementary Table 3.** Clinical baseline data from TCGA database.
